# Supplementary material
Source: Elsevier journal article supplement (https://www.sciencedirect.com/science/article/pii/S1699885519300248)
Supplement: mmc1 [file S1699885519300248:mmc1.docx]

**Anexo I (o figura): Modelo de informe. Espécimen: BIOPSIA POR CILINDROS.**

*Filiación/localización: ”……………………………….…………”:*

*Diagnóstico:*

1.-Tipo histológico: Adenocarcinoma acinar

Otro/Variantes……………………………………………

2- Grupo pronóstico OMS.

3- Gleason (patrón primario + secundario, si 3 p. el predominante y el peor) =………….

*Si SG 7 (3+4 o 4+3), especificar el % de patrón 4 por su implicación pronóstica*

4-Cuantificación tumoral:

+ Nº de cilindros positivos:……..

+ Nº de cilindros remitidos:……..

+ % cilindro afecto, Gleason (especificar si es distinto en distintos cilindros) y

longitud lineal:…………………………………………………………

5- Infiltración:

+ Perineural: si/no

+ Vesícula seminal (si identificada): si/no

+ Tejido adiposo (si presente): si/no

6- Angioinvasión: si/no

7- Cambios relacionados con el tratamiento, si presentes.

8- Otros hallazgos histopatológicos: Lesiones precursoras o de riesgo (PIN, atipia

glandular…), otros…

**Anexo II: Espécimen: PROSTATECTOMIA RADICAL:**

Diagnóstico:

1-Tipo histológico: Adenocarcinoma acinar

Otro/Variantes………………………………………………

2- Grupo pronóstico OMS

3- Gleason (primario + secundario)=…………..

*Terciario (si hay >5% de patrón 4 o 5 no recogido previamente):…….*

4- Cuantificación tumoral:

+ % próstata y descripción zonas afectadas:………………………...

+ Tamaño nódulo dominante:……………………………………….

5- Extensión extraprostática: si /no

Si presente: localización y extensión:………………………………

Focal / No-focal

6-Margen quirúrgico afectado: si/no

+ Si presente: localización, extensión, Gleason en margen…………

+ Margen positivo: extraprostático vs incisión intraprostática

7- Infiltración:

+ Perineural: si/no

+ Angioinvasión: si/no

+ Vesícula seminal (si identificada): si/no Izda/derecha

+ Cuello vesical: si/no

8- Ganglios linfáticos:

Nº identificado:………..

Nº metástasicos:……….

(Describir lateralidad y tamaño máximo:…….……………..……)

9- Estadio patológico TNM 8th: pT..N..

10- Cambios relacionados con el tratamiento, si presentes.

11- Otros hallazgos histopatológicos: Lesiones precursoras o de riesgo (PIN, atipia

glandular…), otros…
